# Supplementary material for: Powering tyrosol antioxidant capacity and osteogenic activity by biocatalytic polymerization
Source: Royal Society of Chemistry journal article supplement (doi:10.1039/c5ra23004g), 2015-12-22
Supplement: c5ra23004g1.pdf [file c5ra23004g1.pdf]

Electronic Supplementary Information (ESI) for the article

# Powering tyrosol antioxidant capacity and osteogenic activity by biocatalytic polymerization

Stefano Antenucci, Lucia Panzella,\* Hermes Farina, Marco Aldo Ortenzi, Enrico Caneva, Simona Martinotti, Elia Ranzato, Bruno Burlando, Marco d'Ischia, Alessandra Napolitano and Luisella Verotta

## Table of Contents

|                                                                                                   | page |
|---------------------------------------------------------------------------------------------------|------|
| <b>Figure S1.</b> Thermogravimetric analysis (TGA) of OligoTyr.                                   | S2   |
| <b>Figure S2.</b> Non-aqueous size exclusion chromatography (SEC) profile of acetylated OligoTyr. | S3   |
| <b>Figure S3.</b> ESI(-)MS spectrum of OligoTyr.                                                  | S4   |
| <b>Figure S4.</b> MALDI spectrum of OligoTyr.                                                     | S5   |
| <b>Figure S5.</b> Solid state CP-MAS <sup>13</sup> C NMR spectrum of tyrosol.                     | S6   |
| <b>Figure S6.</b> Relative absorption of OligoTyr (top) and tyrosol (bottom) as a function of pH. | S7   |
| <b>Figure S7.</b> SEM micrographs of PLA scaffolds prepared following method A (see main text).   | S8   |
| <b>Figure S8.</b> Release of OligoTyr from PLA scaffolds.                                         | S9   |

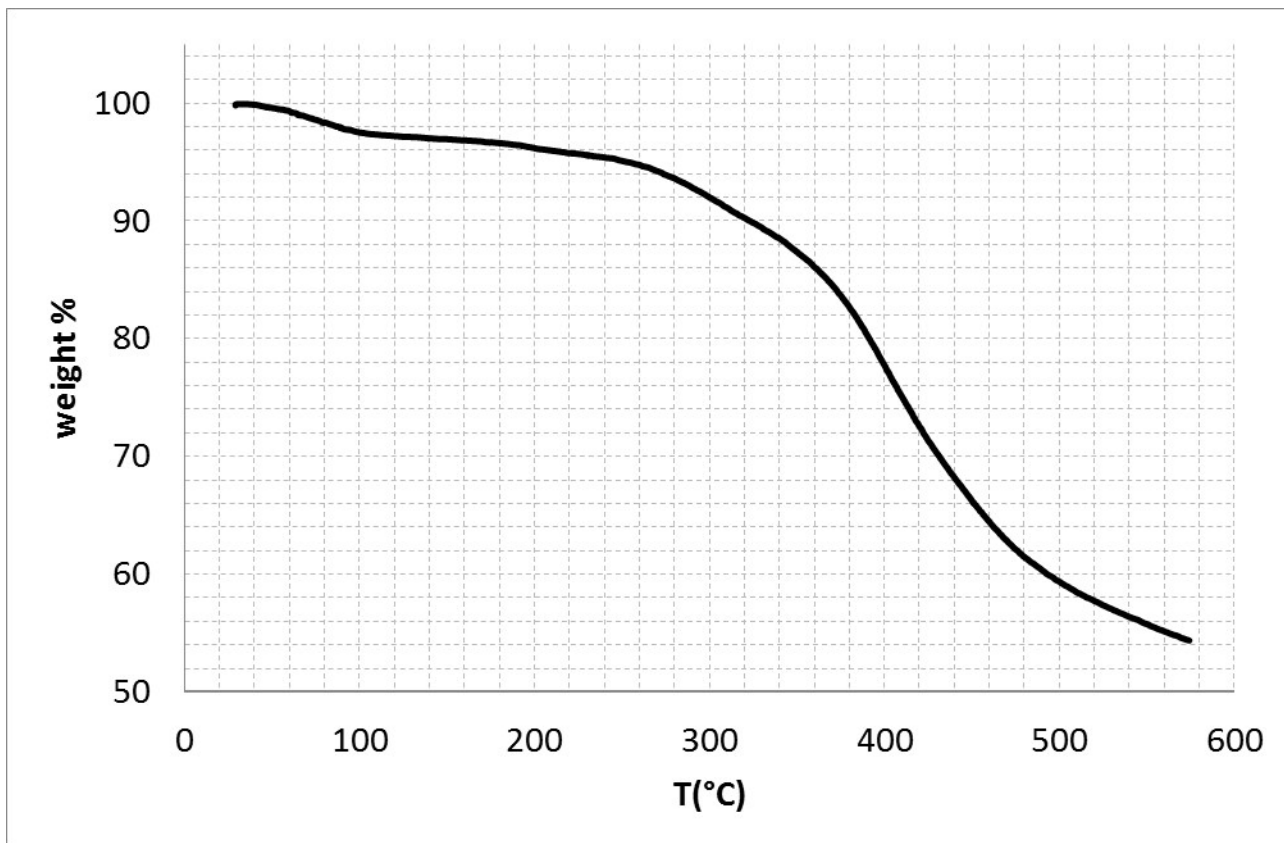

**Figure S1.** Thermogravimetric analysis (TGA) of OligoTyr.

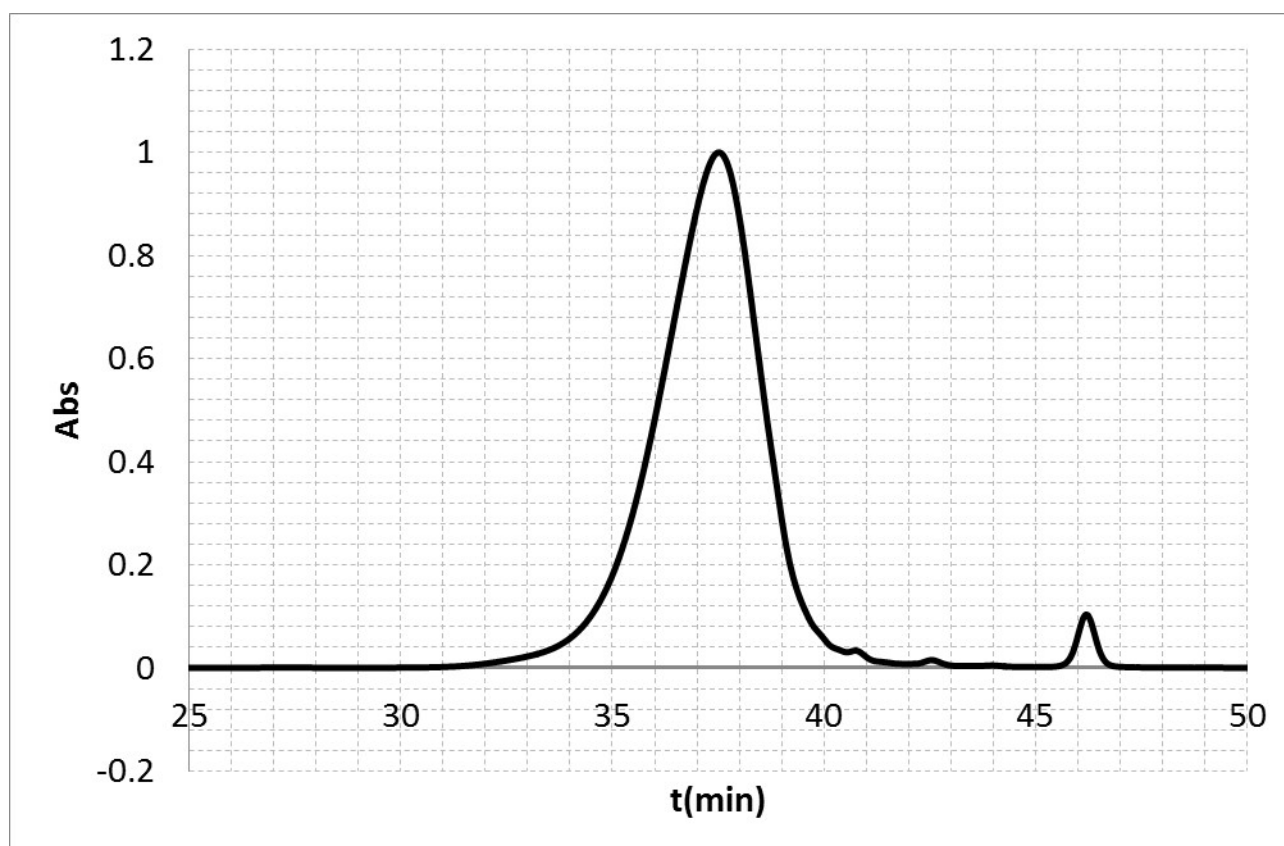

|      |       |
|------|-------|
| Mn = | 2241  |
| Mw = | 2861  |
| Mz = | 4013  |
| Mp = | 2492  |
| D =  | 1.277 |

**Figure S2.** Non-aqueous size exclusion chromatography (SEC) profile of acetylated OligoTyr and molecular weight distribution parameters. The peak at 46 min is due to *o*-dichlorobenzene used as internal standard. Detection set at 280 nm. Mn= number average molecular weight; Mw= weight average molecular weight; Mz= size average molecular weight; Mp= peak average molecular weight; D= polydispersity index.

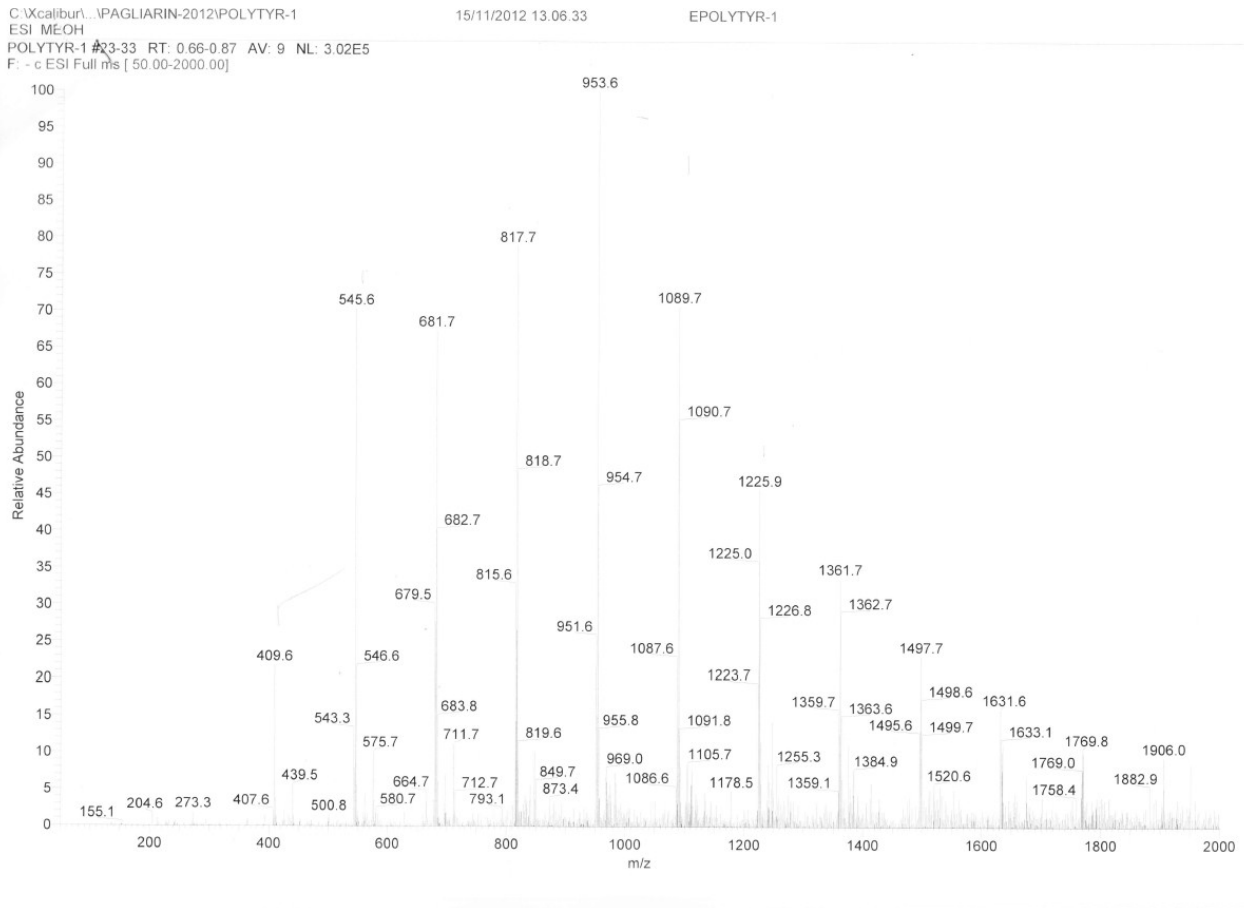

**Figure S3.** ESI(-)MS spectrum of OligoTyr.

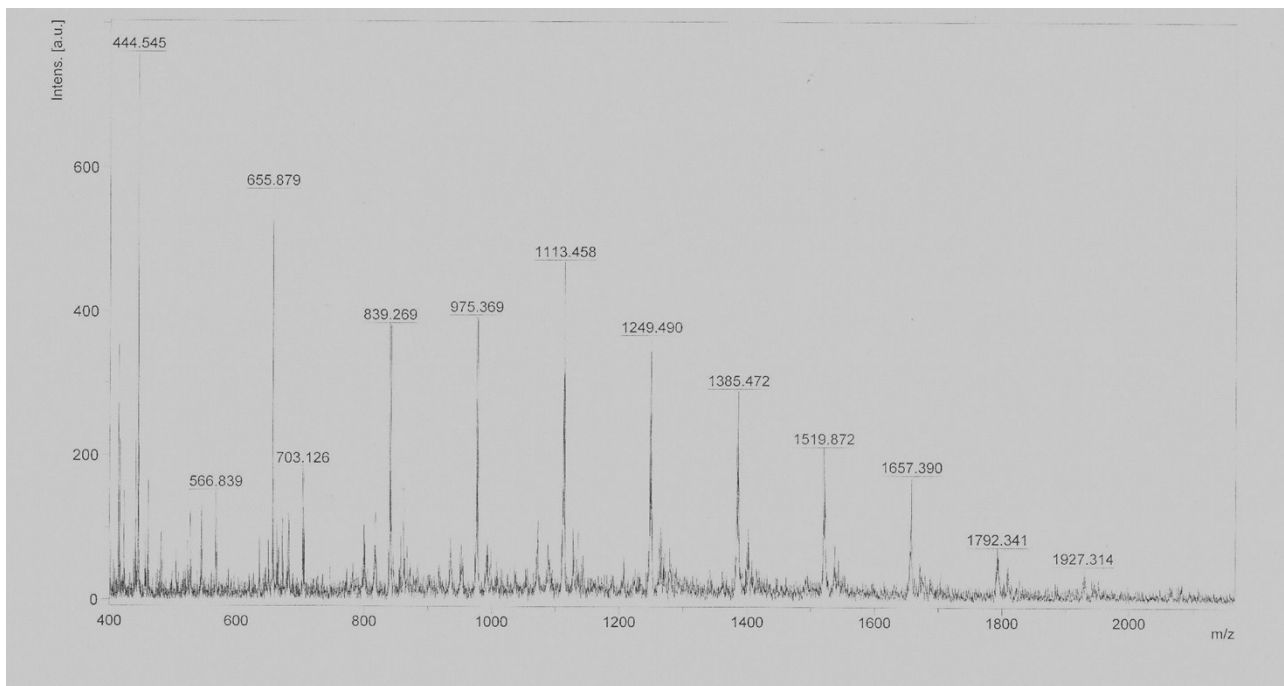

**Figure S4.** MALDI spectrum of OligoTyr.

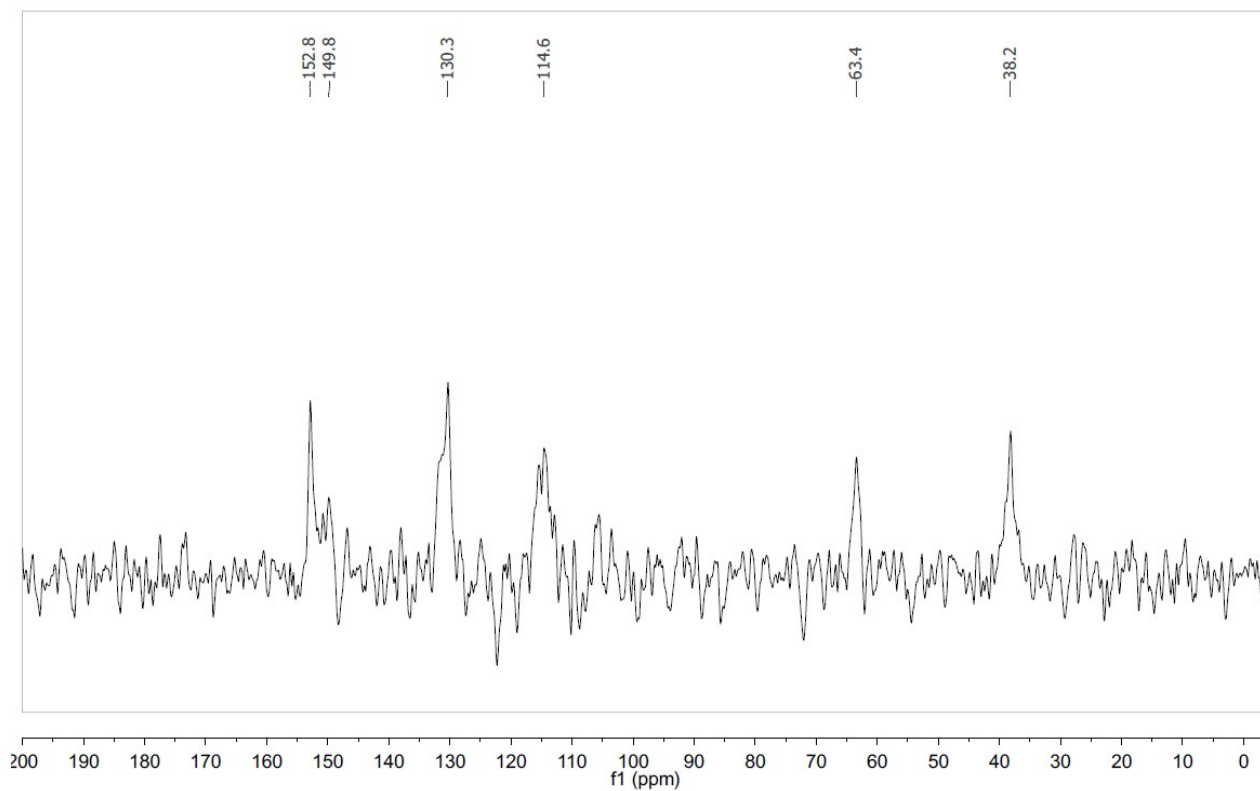

**Figure S5.** Solid state CP-MAS  $^{13}\text{C}$  NMR spectrum of tyrosol.

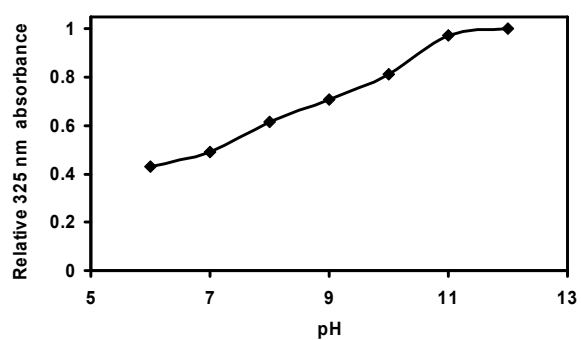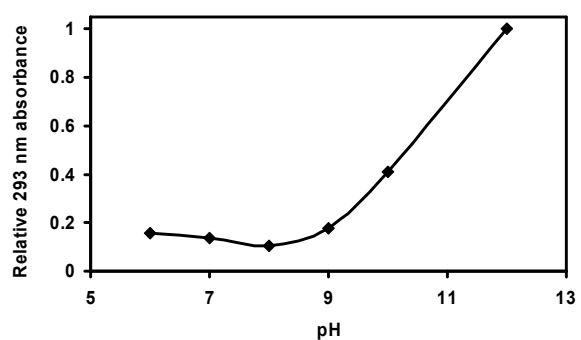

**Figure S6.** Relative absorption of OligoTyr (top) and tyrosol (bottom) as a function of pH. The chosen wavelengths correspond to the absorption maximum of dissociated OligoTyr (325 nm) and tyrosol (293 nm).

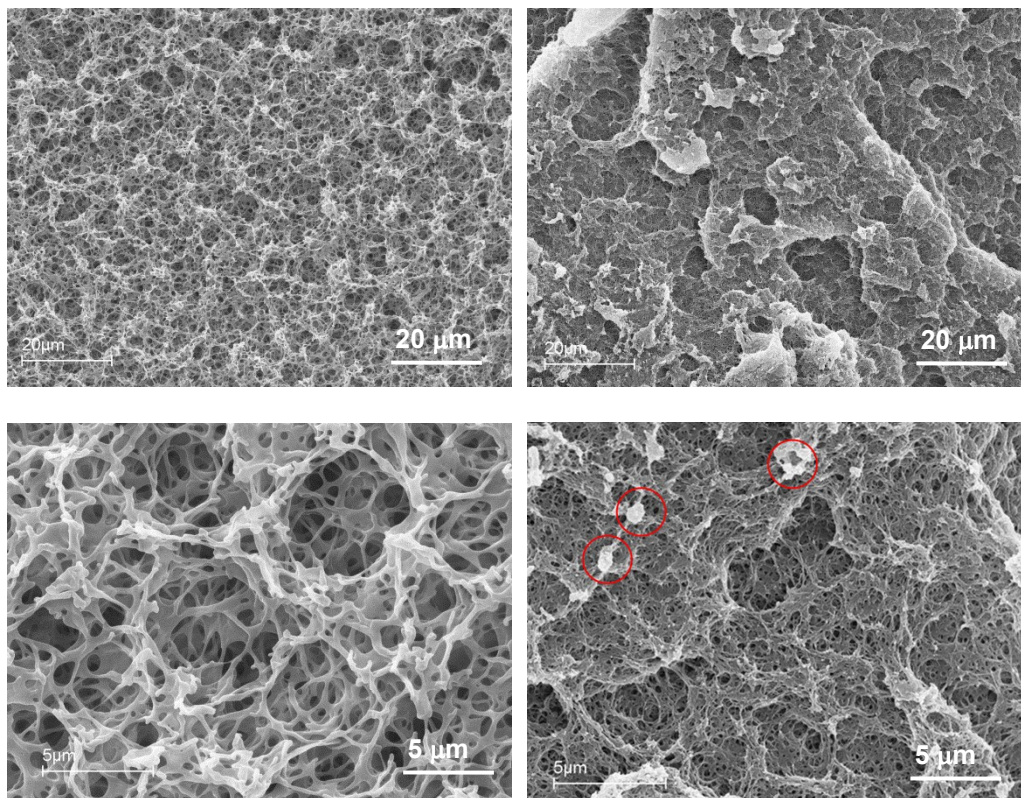

**Figure S7.** Top: SEM micrographs of scaffolds obtained from pure PLA (left) and PLA + 5% OligoTyr (right) prepared following method A (see main text). Bottom: close-up of the scaffolds shown in the upper row. OligoTyr crystals are shown in the red circles.



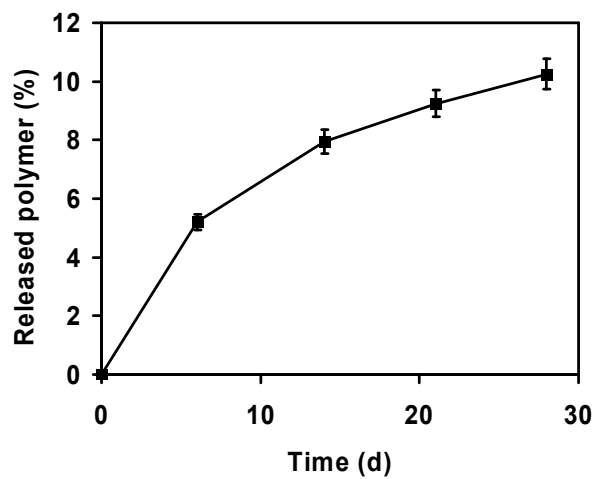

**Figure S8.** Release of OligoTyr from PLA scaffolds at 5% loading in PBS. Reported are the mean  $\pm$  SD values of three experiments.
